# Supplementary material for: A single-cell transcriptional landscape of immune cells shows disease-specific changes of T cell and macrophage populations in human achalasia
Source: PubMed Central journal article supplement (PMC10403544; doi:10.1038/s41467-023-39750-5), 2023-08-04
Supplement: 41467_2023_39750_MOESM1_ESM.pdf [file 41467_2023_39750_MOESM1_ESM.pdf]

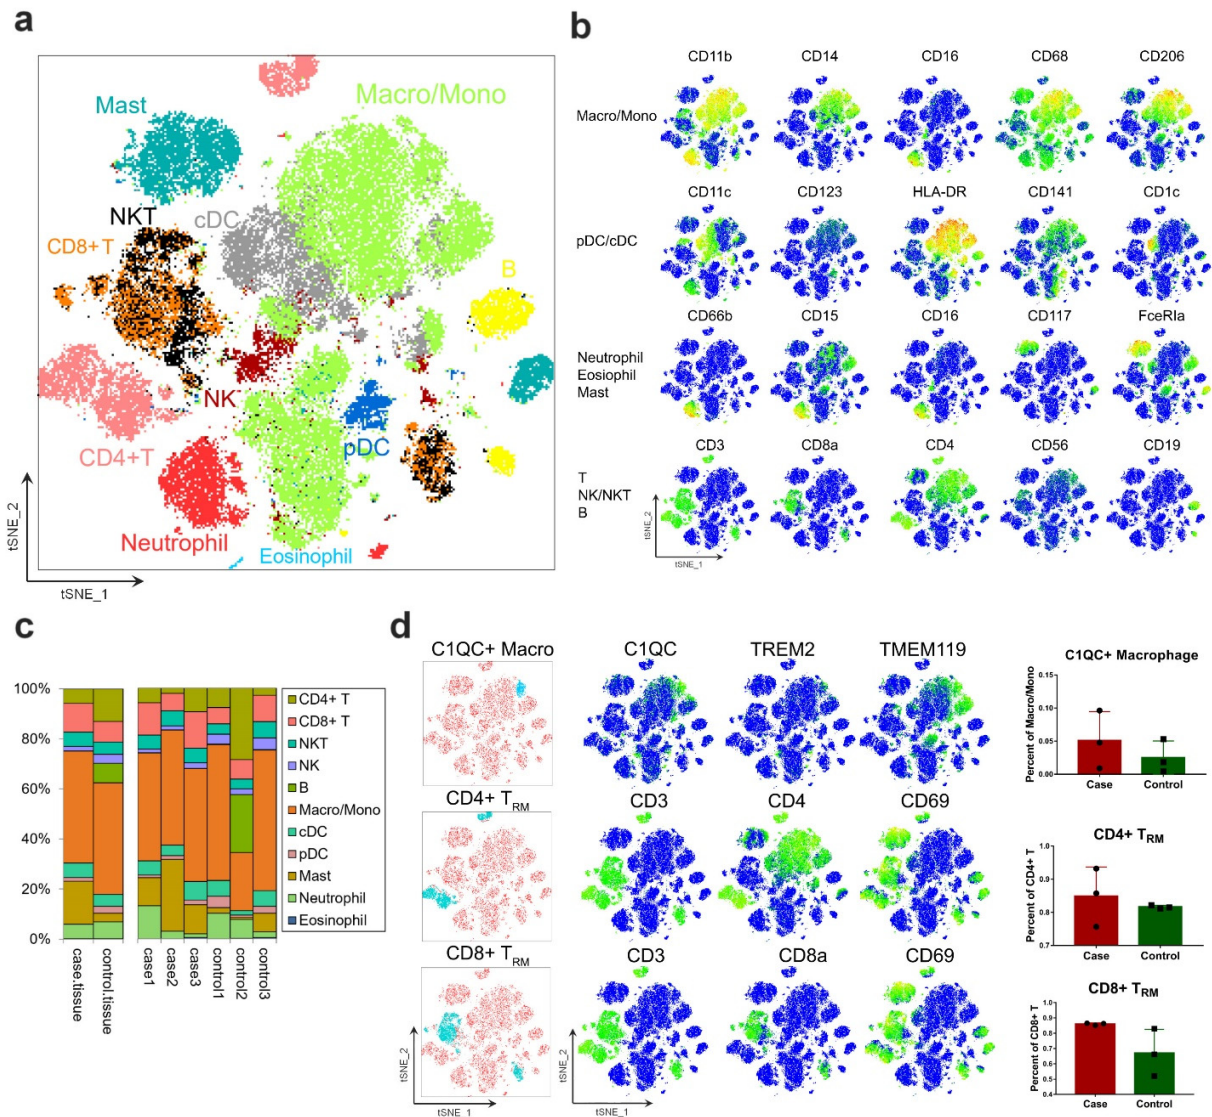

**Supplementary Figure 1 cyTOF analysis of immune cells in the LES tissue.** a, t-SNE plot of the major immune cells found in the LES tissue by cyTOF analysis. b, t-SNE plots of canonical marker genes for the major immune cells found in the LES tissue. c, Major immune cell proportions for LES tissue and blood between achalasia and controls, colored by cell type. d, t-SNE plots (left), marker genes (middle), and quantifications (right) of C1QC<sup>+</sup> macrophages and T<sub>RM</sub> in CyTOF analysis. The quantifications were compared between achalasia ( $n = 3$ ) and controls ( $n = 3$ ), and data are represented as mean  $\pm$  SD. Statistics: two-tailed unpaired t test. CyTOF analysis showed an increased tendency of C1QC<sup>+</sup> macrophages and T<sub>RM</sub> in the LES of achalasia

compared with controls. Macro/Mono, macrophages and monocytes. Source data are provided as a Source Data file.

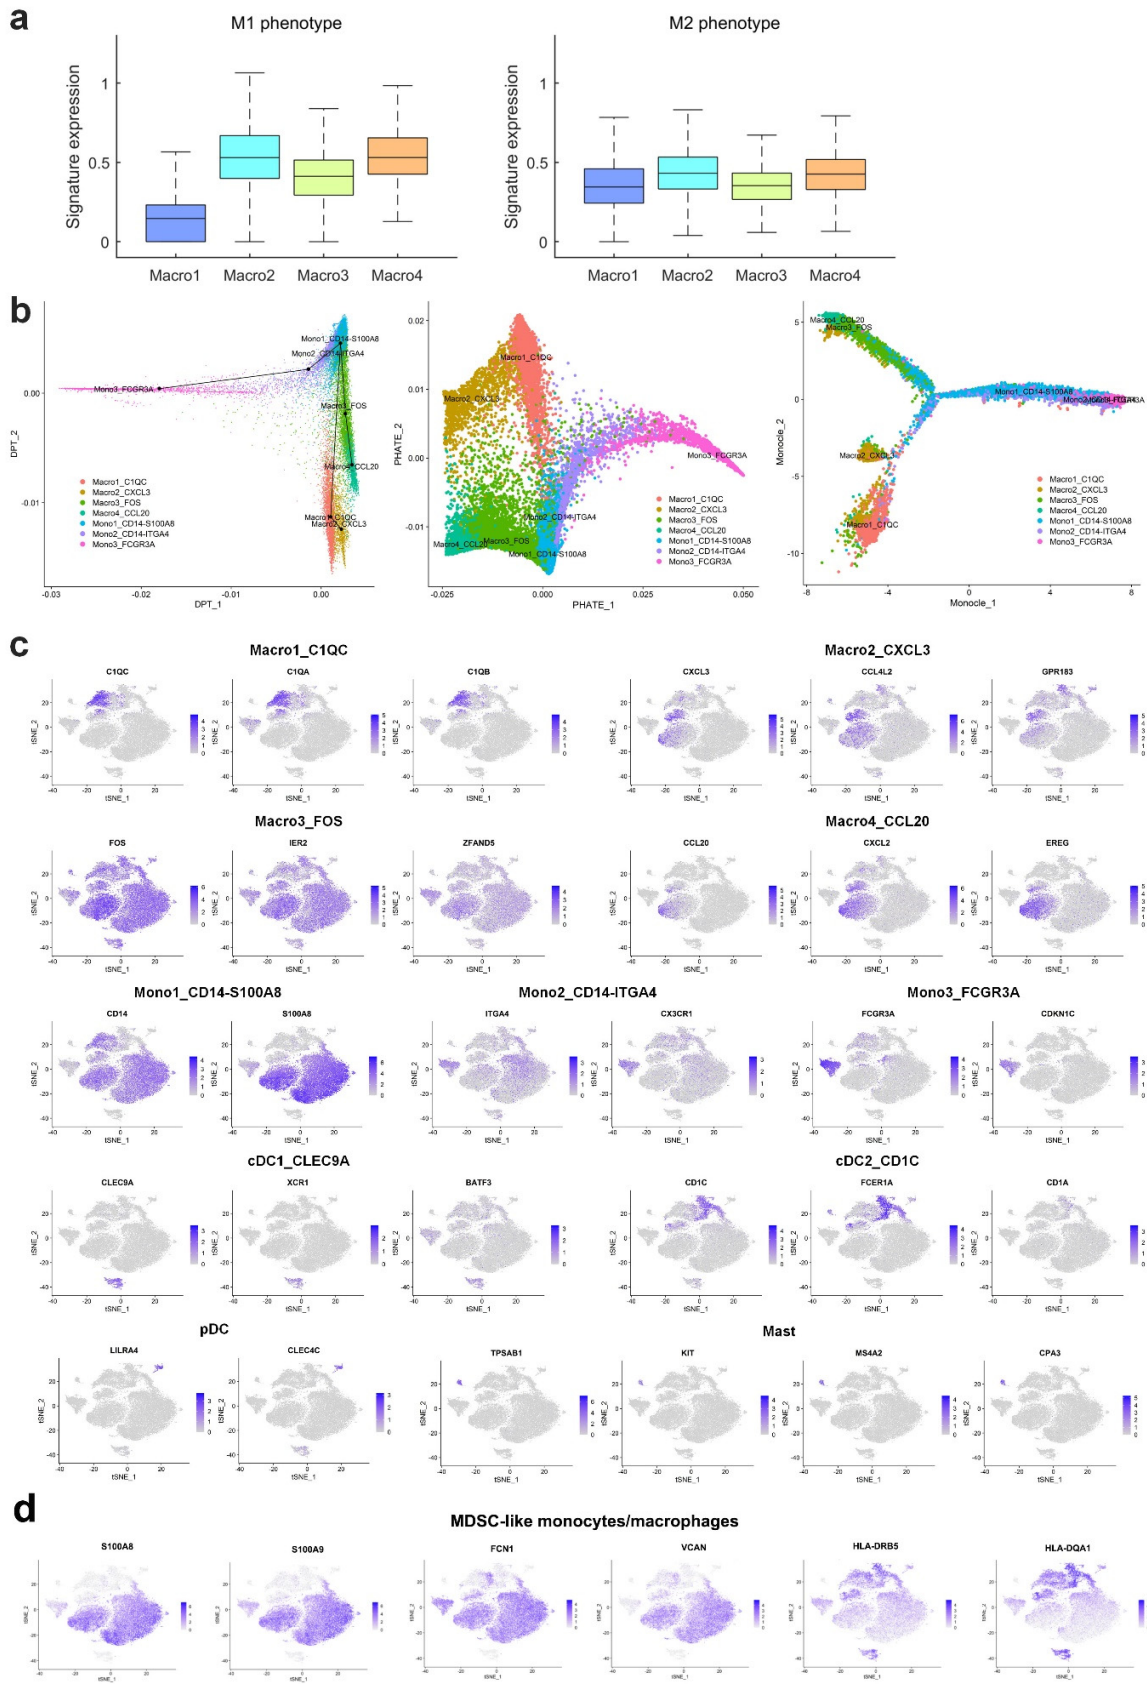

**Supplementary Figure 2 Single-cell transcriptomics of subclustered myeloid cells.** a, Comparison of M1/M2 macrophage phenotypes across all macrophage clusters, calculated by the mean expressions of corresponding signature genes. Case,  $n = 9$ ; controls,  $n = 4$ . The results are depicted in boxplots, in which the value for each patient is represented by a dot, the upper and lower bounds represent the 75% and 25% percentiles, respectively, the center bars indicate the medians, and the whiskers denote values up to 1.5 interquartile ranges above the 75% or below the 25% percentiles. b, Pseudotemporal transcriptional trajectory of monocytes/macrophages using DPT (calculated by Slingshot algorithms), PHATE and Monocle 2. c, t-SNE plots of detailed canonical marker genes of myeloid clusters. d, Canonical marker genes of myeloid-derived suppressor cell like monocytes/macrophages (MDSC-like monocytes/macrophages). MDSC-like monocytes/macrophages highly expressed S100A family genes of S100A8, S100A9, FCN1 and VCAN, and relatively low expressed of HLAs of HLA-DRB5 and HLA-DQA1. Source data are provided as a Source Data file.

**a** Human gut-resident macrophages signature (Bujko et al.)

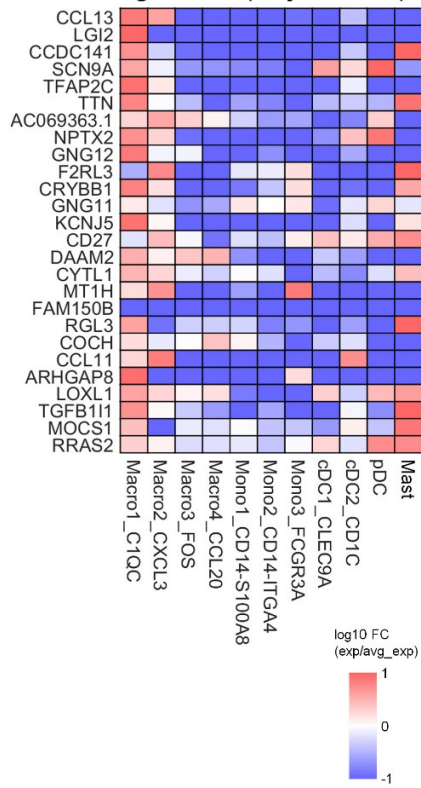

**b** Mouse gut-resident macrophages signature (Shaw et al.)

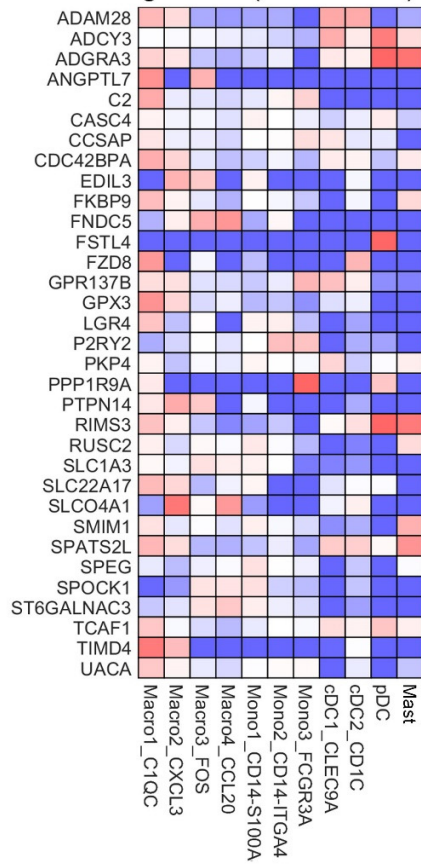

**c**

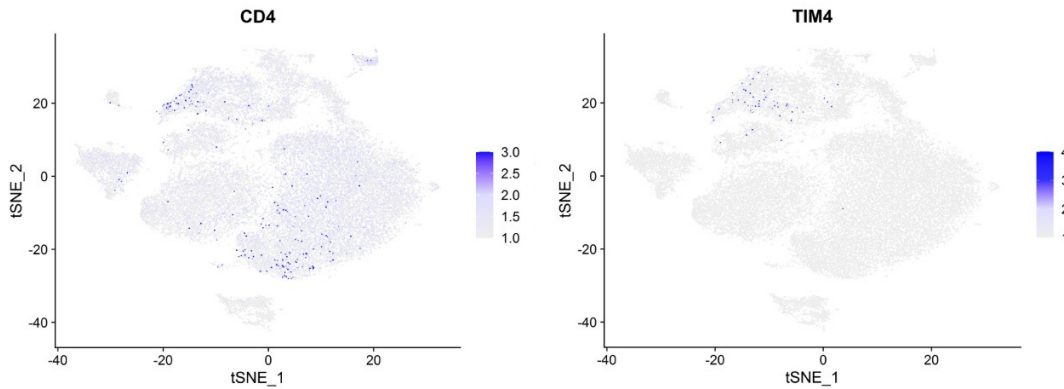

**d**

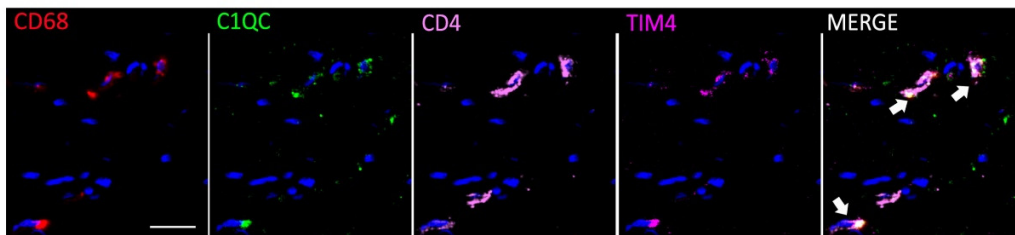

**Supplementary Figure 3 C1QC<sup>+</sup> macrophages expressed transcriptional gene set and marker genes similar to those of previously reported gut-resident macrophages.** a, b, C1QC<sup>+</sup> macrophages expressed transcriptional gene set similar to those of previously reported gut-resident macrophages of human (c) and mouse (c). c, d, t-SNE plots showed the high expressions of *CD4* and *TIM4* in C1QC<sup>+</sup> macrophages (c) and validated by multicolor IHC (d). CD68 (red), C1QC (green), CD4 (pink), TIM4 (magenta). Scale bar, 20  $\mu$ m. Arrow, C1QC<sup>+</sup> macrophages. Source data are provided as a Source Data file.

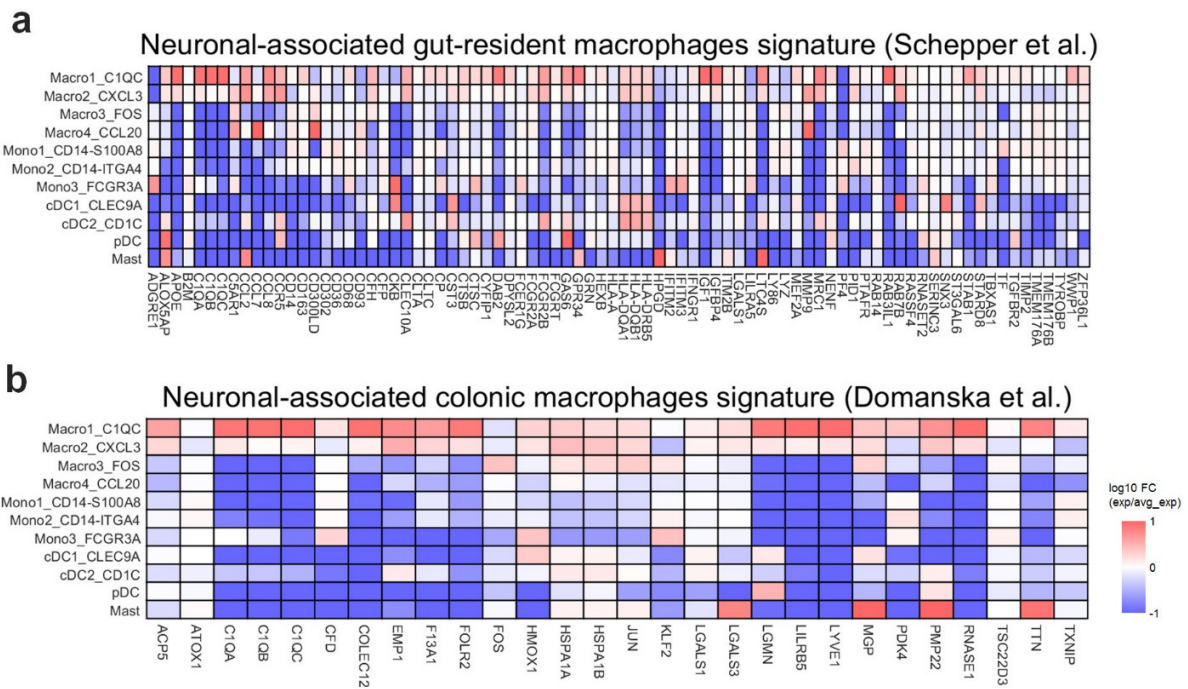

**Supplementary Figure 4 Comparison of marker genes of myeloid cells with previously reported neuronal-associated gut-resident macrophages gene sets.** a, Comparison of marker genes of myeloid clusters with previously reported neuronal-associated gut-resident macrophages gene set. b, Comparison of marker genes of myeloid cells with previously reported neuronal-associated colonic macrophages gene set. In the study of Domanska, they performed scRNA-seq and found neuronal-associated colonic macrophages were similar to gut-resident macrophages. Source data are provided as a Source Data file.

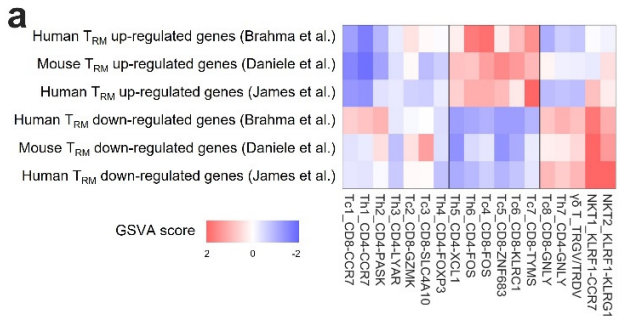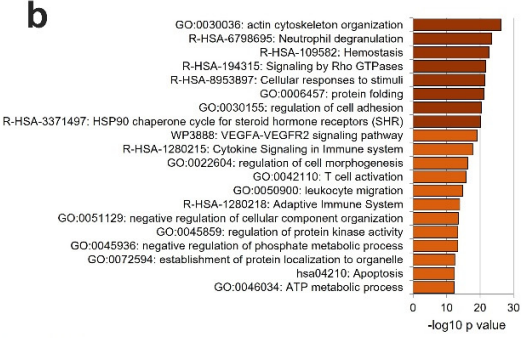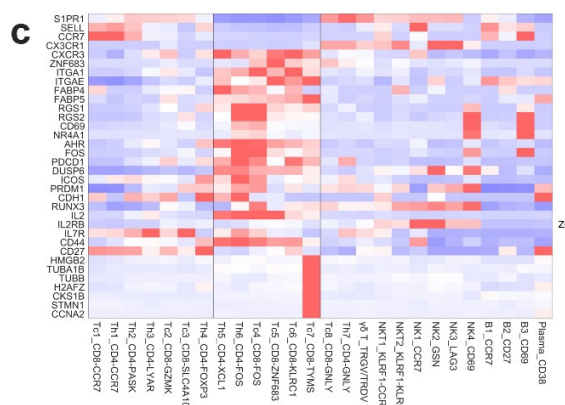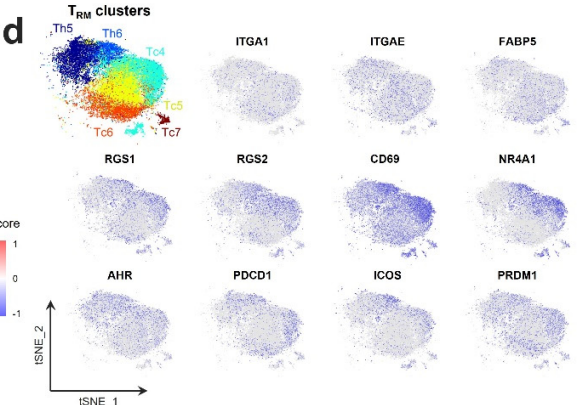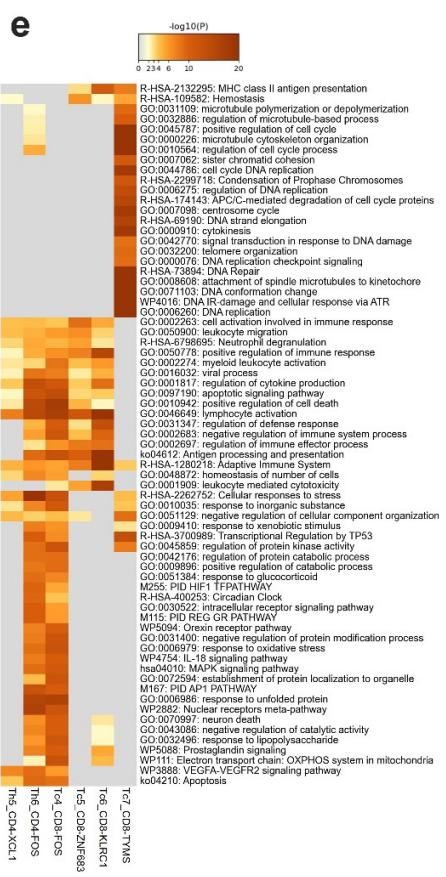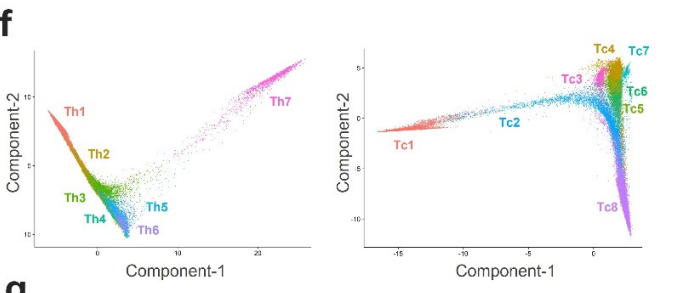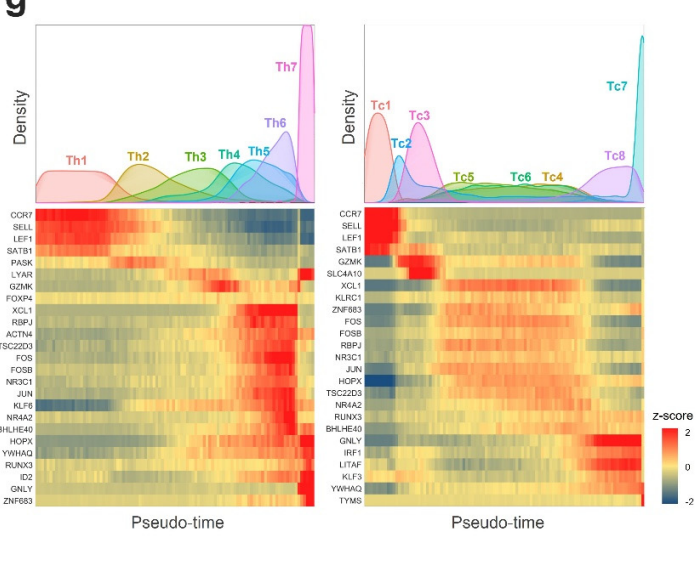

**Supplementary Figure 5 Single-cell transcriptomics of T<sub>RM</sub> subclusters.** a, Gene set variation analysis (GSVA) analysis comparing the marker genes for T<sub>RM</sub> with previously reported signatures of T<sub>RM</sub>. b, Metascape analysis of merged marker genes of T<sub>RM</sub>. c, d, Heatmap (c) and t-SNE plots (d) of relative expression levels of canonical marker genes across T<sub>RM</sub>. e, Metascape analysis of marker genes of T<sub>RM</sub> subclusters. f, Pseudotemporal trajectories of CD4<sup>+</sup> and CD8<sup>+</sup> T cells using the DPT algorithm. g, Heatmap showing the continuous phenotypic variations and pseudotime with cell-type-specific gene changes. Statistics: *P* value in (b, e): Fisher's exact test. Source data are provided as a Source Data file.



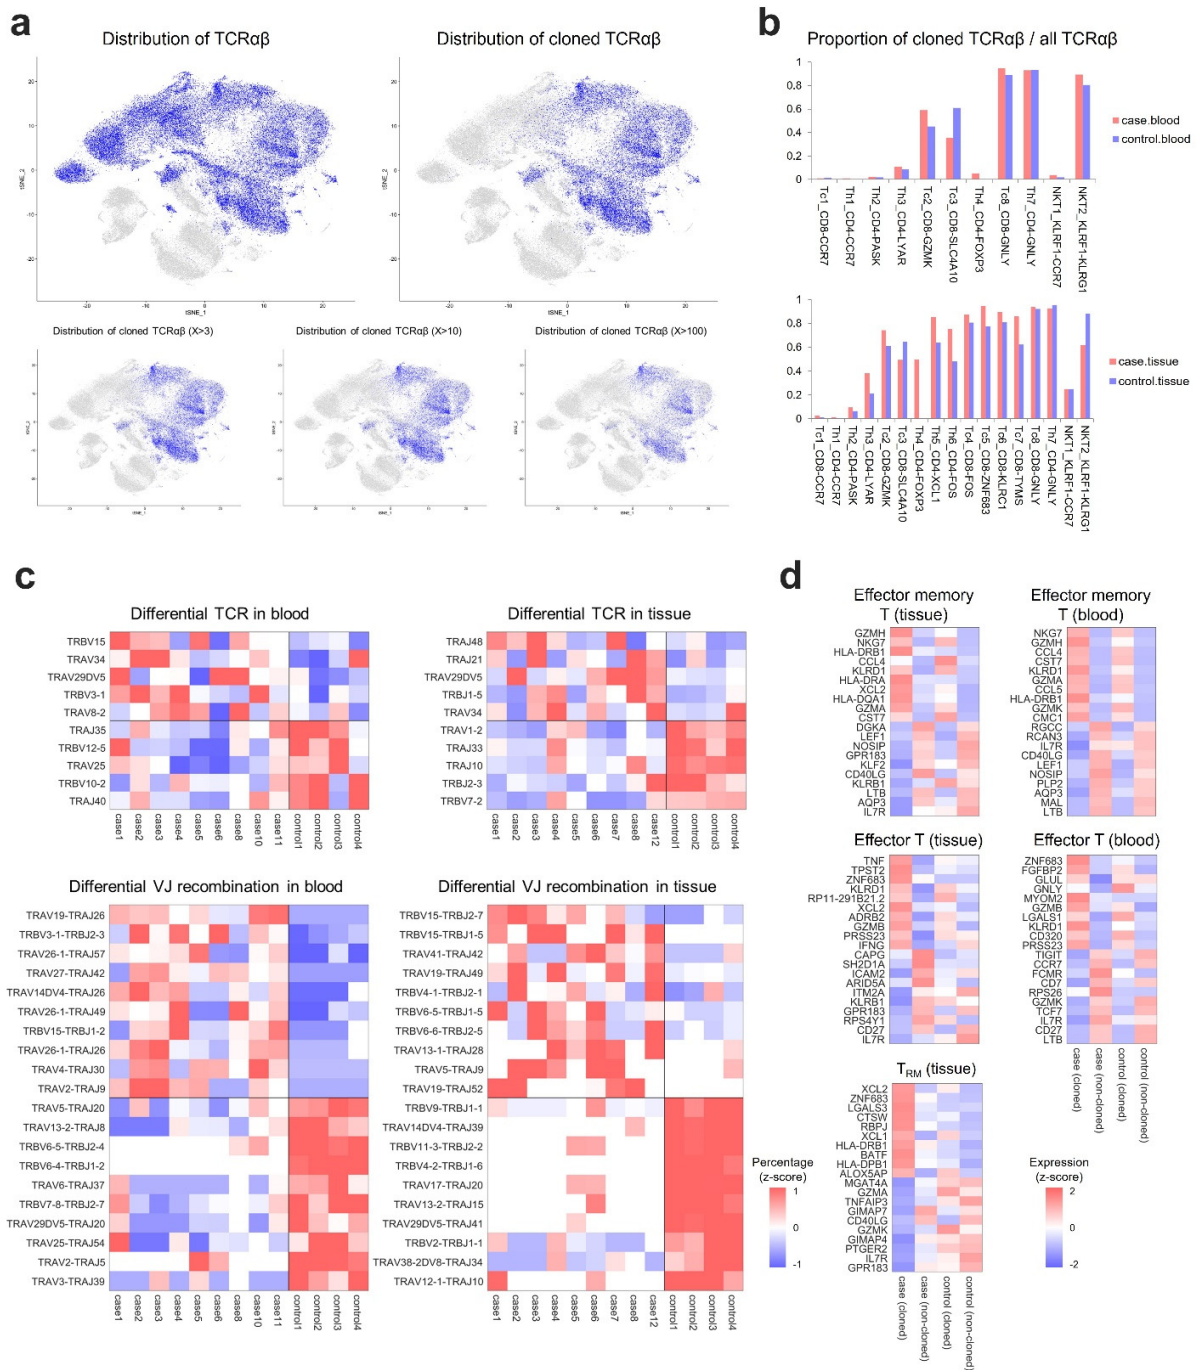

**Supplementary Figure 6 Detailed TCR repertoire based on T cell subclusters in achalasia and controls.** a, t-SNE plots of the TCR repertoire. b, Comparison of the cloned TCR repertoire of different T cells between achalasia and controls. c, Heatmap showing differential TCR and VJ recombinations between achalasia and controls. d, Comparison of DEGs associated with cloned

expanded and unexpanded T cells between achalasia and controls. Source data are provided as a Source Data file.

**a**Risk genes of achalasia ( $p < 0.05$ )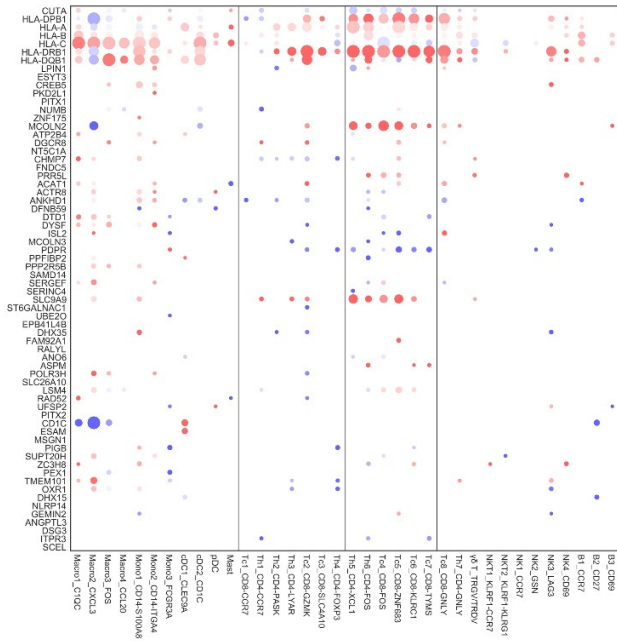**b**

DEGs (case/control) in Macro1\_C1QC: 381  
 Risk genes of achalasia: 53  
 Overlap: 13  
 Overlap  $p$ -value:  $8.45e-10$

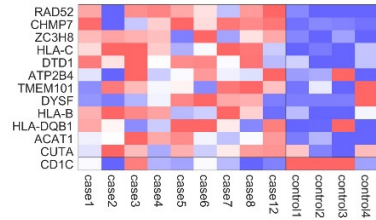**c**

DEGs (case/control) in T<sub>RM</sub>: 377  
 Risk genes of achalasia: 48  
 Overlap: 18  
 Overlap  $p$ -value:  $1.04e-15$

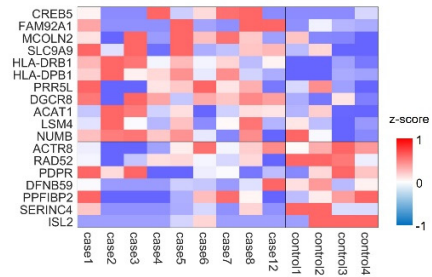**d**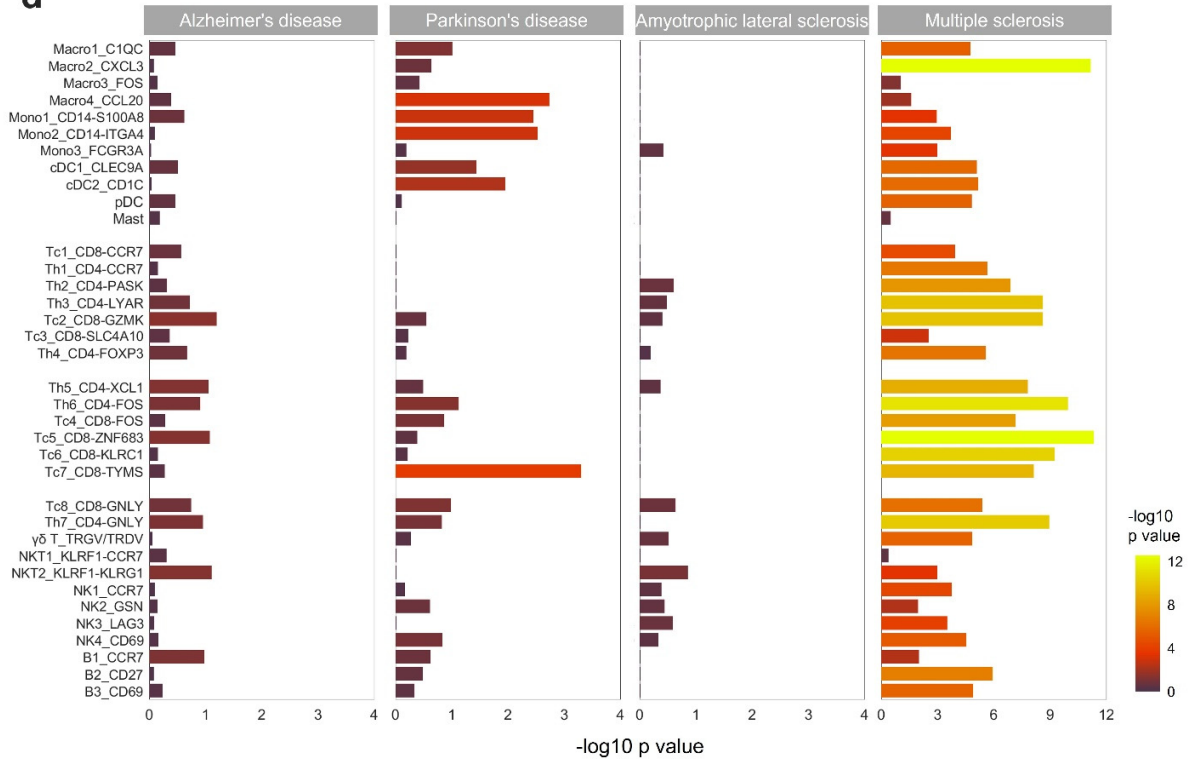

**Supplementary Figure 7 DEGs for C1QC<sup>+</sup> macrophages and T<sub>RM</sub> overlapped with risk genes for achalasia and other neurodegenerative diseases.** a, Comparison of DEGs for myeloid cells and T<sub>RM</sub> with risk genes for achalasia identified by whole-exome sequencing (WES). Only the points with  $P < 0.05$  were illustrated. b, c, Specific DEGs for C1QC<sup>+</sup> macrophages (b) and T<sub>RM</sub> (c) overlapped with risk genes for achalasia identified by WES. d, Significant levels of the overlap between DEGs of achalasia and risk genes for other neurodegenerative diseases from the GWAS catalog (<https://www.ebi.ac.uk/gwas/>), including PD, AD, ALS, and MS. Both the axis and heat key are represented as p value (Fisher's exact test). Statistics:  $P$  value in (a): two-sided Wilcoxon rank sum test.  $P$  value in (b-d): Fisher's exact test.

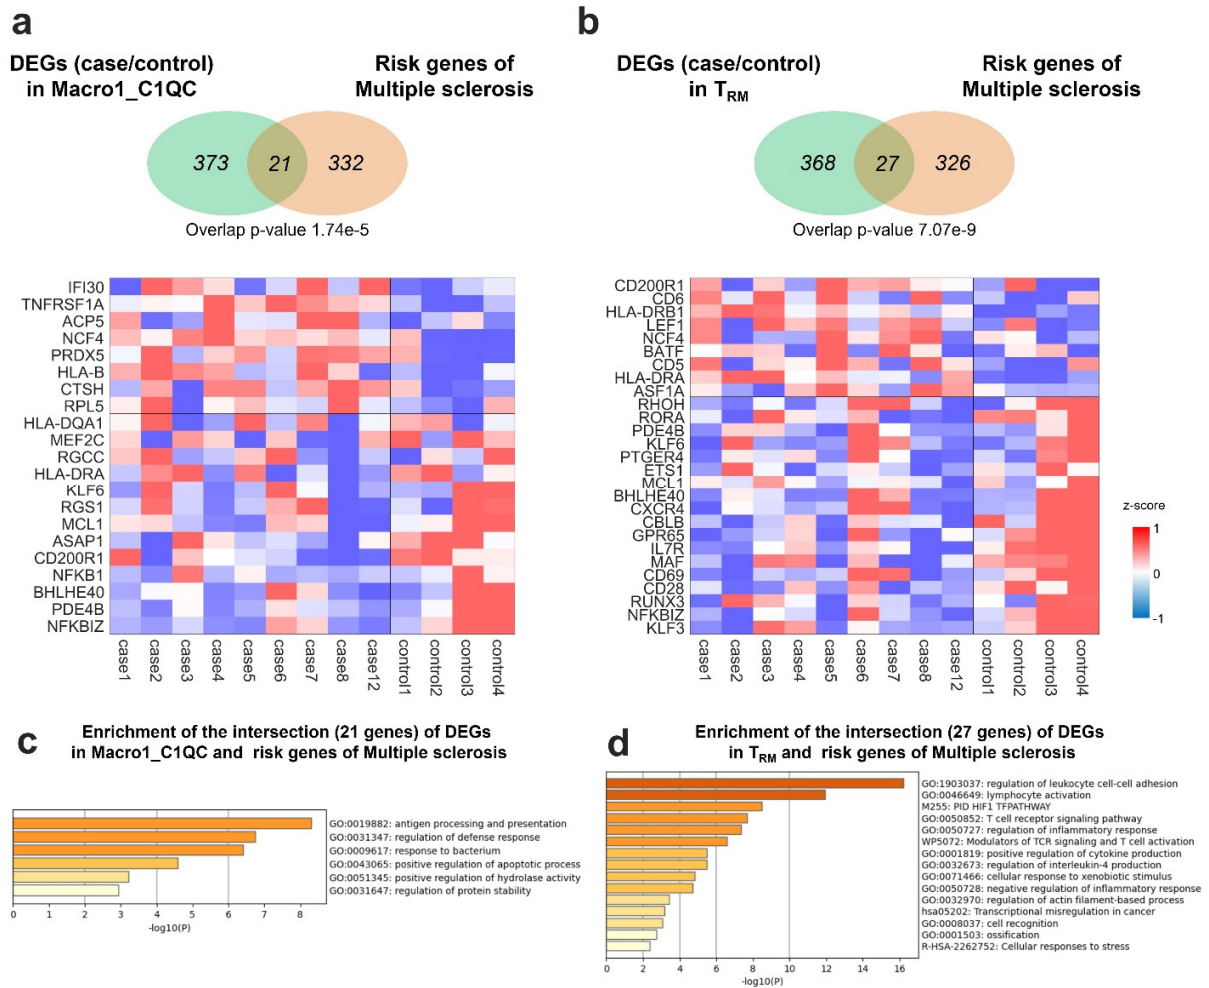

**Supplementary Figure 8 DEGs for C1QC<sup>+</sup> macrophages and T<sub>RM</sub> overlapped with risk genes for MS.** a, Venn diagram (upper) and heatmap (lower) comparing the DEGs for C1QC<sup>+</sup> macrophages with risk genes for MS identified by GWAS. b, Venn diagram (upper) and heatmap (lower) comparing the DEGs for T<sub>RM</sub> with risk genes for MS identified by GWAS. c, d, Metascape analysis of overlapped DEGs in C1QC<sup>+</sup> macrophages (c) and T<sub>RM</sub> (d) with multiple sclerosis risk genes identified by GWAS. Statistics: *P* value in (a-d): Fisher's exact test. DEGs, differentially expressed genes. Source data are provided as a Source Data file.



**Supplementary Figure 9 Achalasia was characterized by altered interactions between C1QC<sup>+</sup> macrophages and T<sub>RM</sub>.** a, Heatmap of the putative differential receptor-ligand interactions in achalasia compared with controls. b, Specific upregulated and downregulated interactions in achalasia compared with controls. c, Circos plot showing all putative upregulated or downregulated interactions between C1QC<sup>+</sup> macrophages and T<sub>RM</sub> subclusters for achalasia. d, e, Top-predicted differentially expressed ligands and target genes between C1QC<sup>+</sup> macrophages and T<sub>RM</sub>. Source data are provided as a Source Data file.

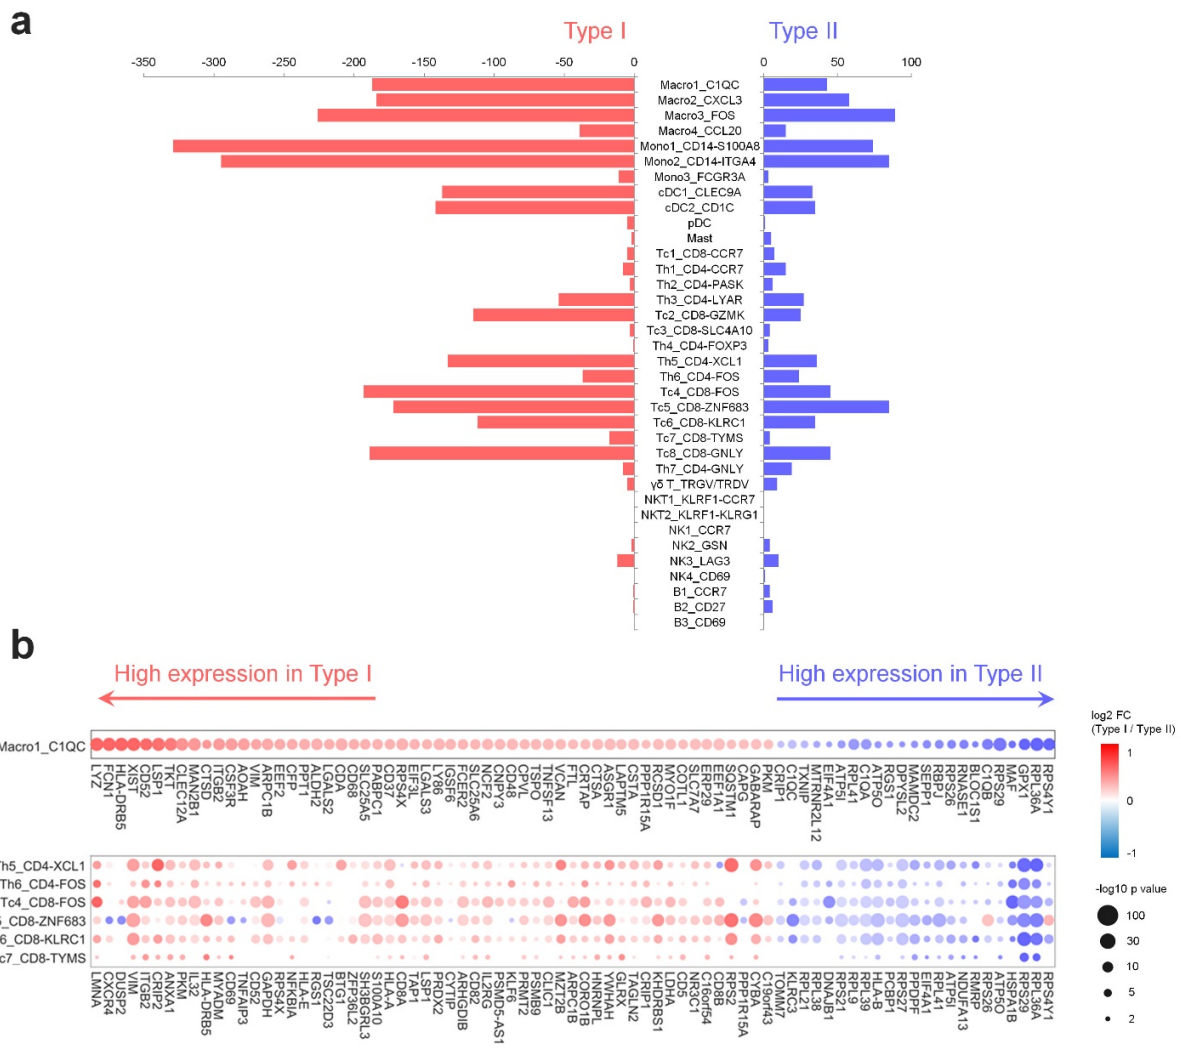

**Supplementary Figure 10 DEGs in type I and type II achalasia.** a, Bar graph showing the upregulated DEGs in myeloid cells and lymphocytes in type I and type II achalasia, respectively. b, Dot plot showing the expression patterns for selected DEGs in C1QC<sup>+</sup> macrophages and TRM in type I and type II achalasia. Statistics: *P* value in (b): two-sided Wilcoxon rank sum test. Source data are provided as a Source Data file.



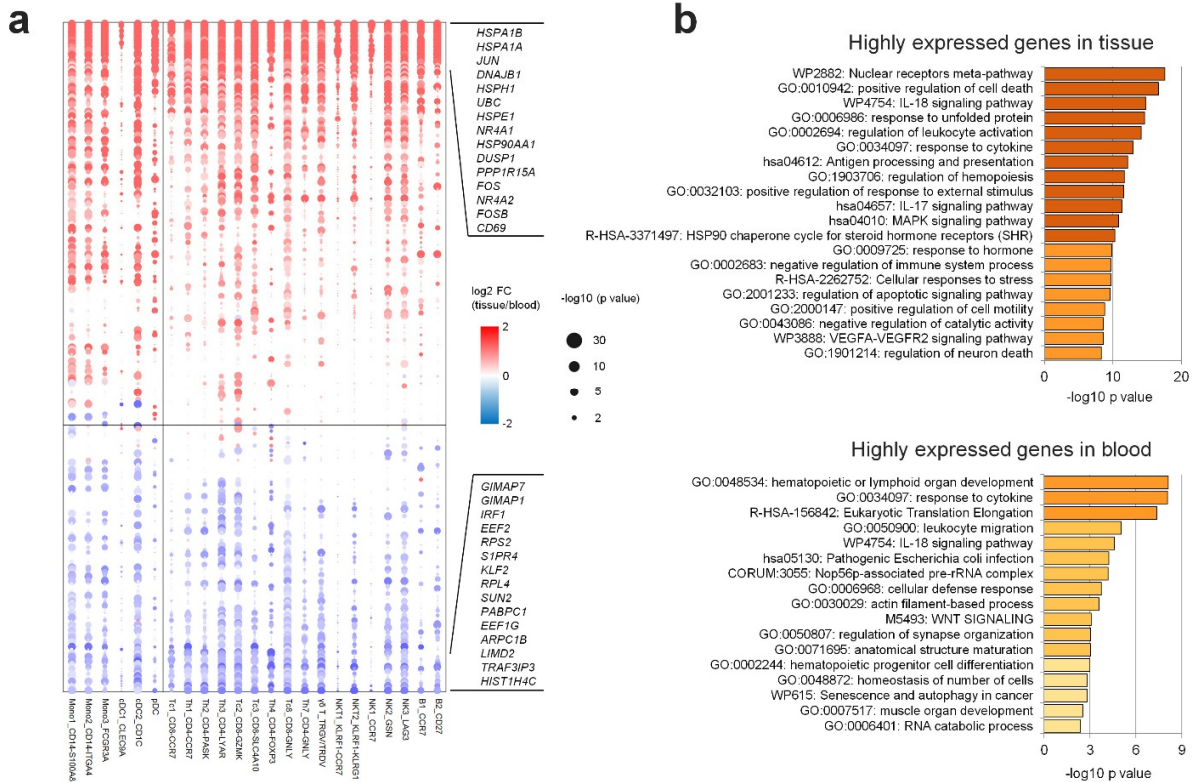

**Supplementary Figure 11 Transcriptional difference of immune cells between peripheral blood and LES tissue.** a, Dot plot showing differential expressed genes for immune cells between peripheral blood and LES tissue. Statistics: two-sided Wilcoxon rank sum test. b, Metascape analysis of merged differential expressed genes between peripheral blood and LES tissue. Statistics: Fisher's exact test. Source data are provided as a Source Data file.

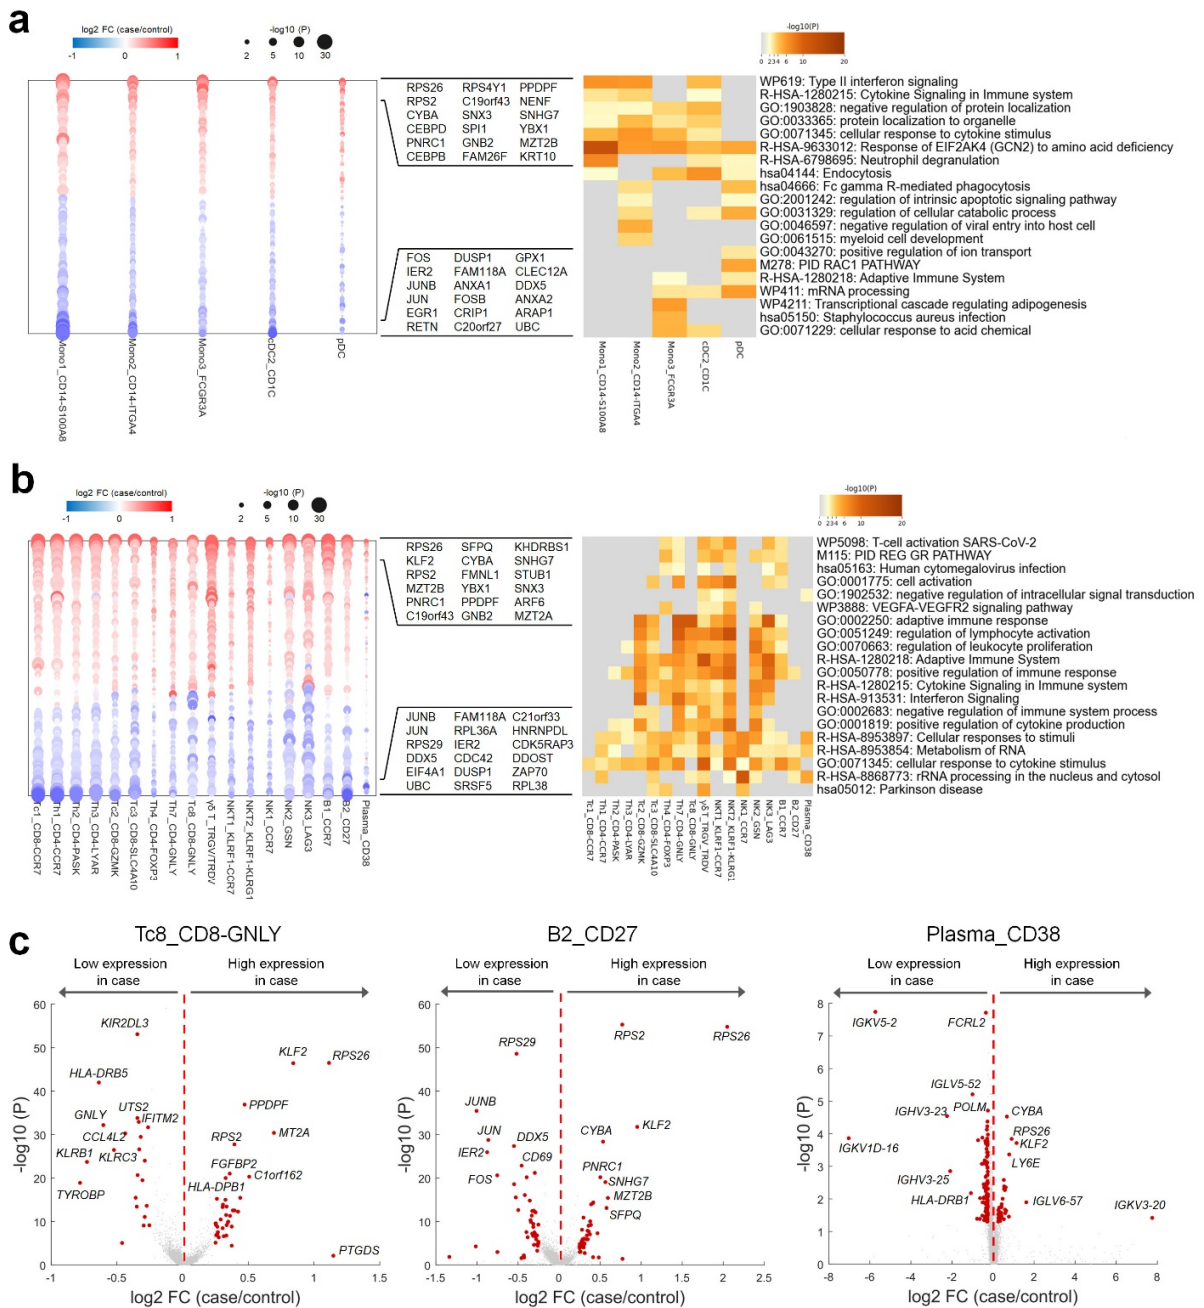

**Supplementary Figure 12 Achalasia-associated transcriptional changes of immune cells in peripheral blood.** a, Dot plot (left) and Metascape analysis (right) of DEGs for peripheral blood myeloid cells between achalasia and controls. b, Dot plot (left) and Metascape analysis (right) of DEGs for peripheral blood lymphocytes between achalasia and controls. c, Volcano plots showing the DEGs of GNLY<sup>+</sup> CD8<sup>+</sup> T cells, CD27<sup>+</sup> B cells and plasma in peripheral blood between achalasia and controls. Statistics: *P* value in Dot plots (a-left, b-left) and Volcano plots (c): two-

sided Wilcoxon rank sum test;  $P$  value in Metascape analysis (a-right, b-right): Fisher's exact test.

Source data are provided as a Source Data file.

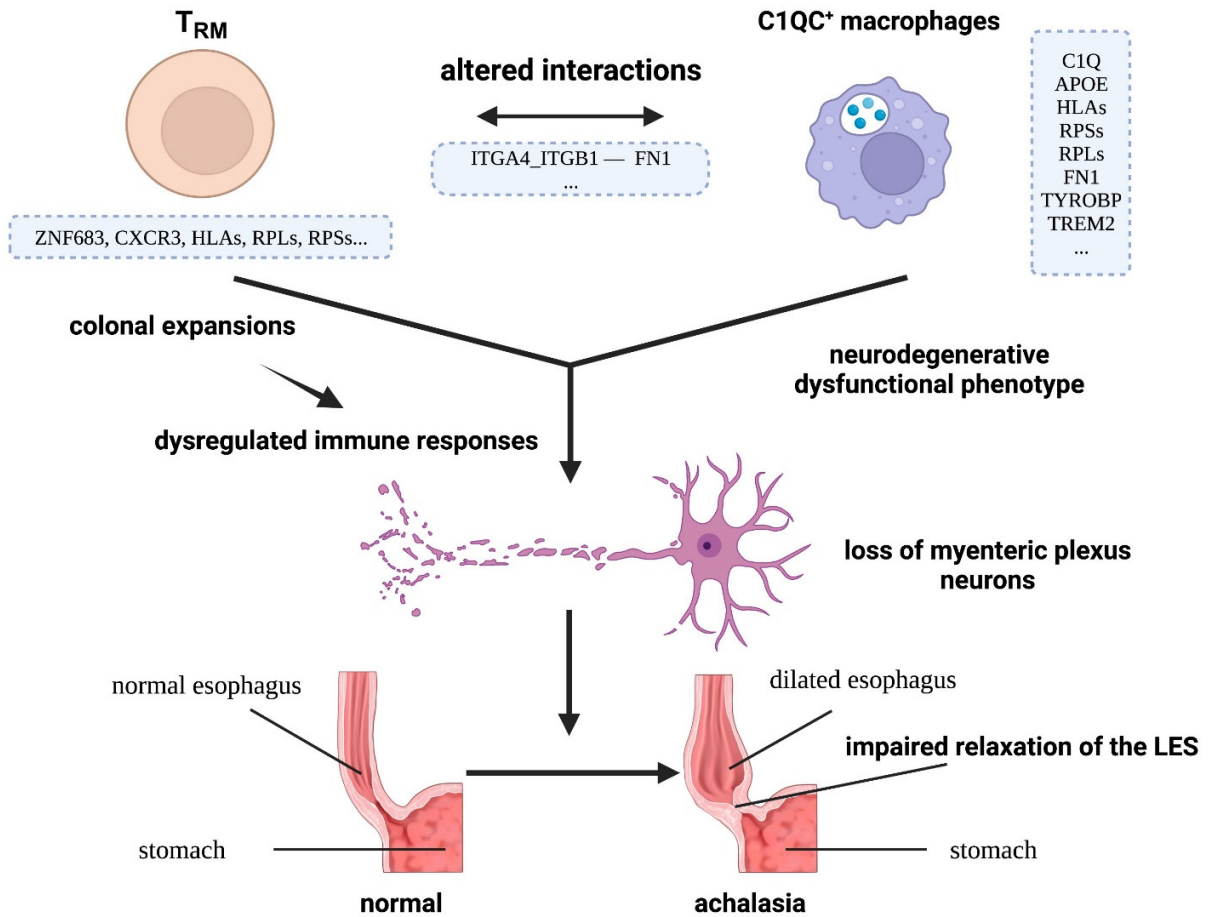

**Supplementary Figure 13 Illustration showing the possible pathophysiology of achalasia.** C1QC<sup>+</sup> macrophages and T<sub>RM</sub> were significantly expanded and localized surrounding the myenteric plexus in the LES tissue of achalasia. C1QC<sup>+</sup> macrophages were transcriptionally similar to microglia of the CNS and exhibited a neurodegenerative dysfunctional phenotype in achalasia. T<sub>RM</sub> also expressed transcripts of dysregulated immune responses in achalasia. By potential interactions, the C1QC<sup>+</sup> macrophages together with T<sub>RM</sub> might cause the ganglionitis and loss of myenteric neurons. The loss of myenteric neurons could lead to the aberrant esophageal peristalsis, dilated esophagus, and impaired relaxation of the LES, and finally the occurrence of achalasia.
