# Supplementary material for: A single-cell transcriptional landscape of immune cells shows disease-specific changes of T cell and macrophage populations in human achalasia
Source: PubMed Central journal article supplement (PMC10403544; doi:10.1038/s41467-023-39750-5), 2023-08-04
Supplement: 41467_2023_39750_MOESM3_ESM.pdf [file 41467_2023_39750_MOESM3_ESM.pdf]

## **Description of Additional Supplementary Files**

Supplementary Data 1. Sample and data information.

Supplementary Data 2. Marker genes for annotations.

Supplementary Data 3. cyTOF analysis.

Supplementary Data 4. Subclustered myeloid cells.

Supplementary Data 5. C1QC<sup>+</sup> macrophages

Supplementary Data 6. Subclustered lymphocytes.

Supplementary Data 7. TCR analysis.

Supplementary Data 8. BCR analysis.

Supplementary Data 9. Risk genes.

Supplementary Data 10. Cell-cell communication.

Supplementary Data 11. Subtype analysis.

Supplementary Data 12. Comparison between blood and tissue.

Supplementary Data 13. Antibody list.
